# Supplementary material for: Utility of the AVISE Connective Tissue Disease test in predicting lupus diagnosis and progression
Source: PubMed Central journal article supplement — Lupus Sci Med. 2020 Mar 18;7(1):e000345. doi: 10.1136/lupus-2019-000345 (PMC7101049; doi:10.1136/lupus-2019-000345), 2020-03-18
Supplement: lupus-2019-000345supp001.pdf [file lupus-2019-000345supp001.pdf]

**Supplemental Table 1.** Sensitivity, specificity, positive predictive value (PPV), and negative predictive value (NPV) of the AVISE test and serologic markers.

| Marker | Sensitivity      | Specificity      | PPV              | NPV              |
|--------|------------------|------------------|------------------|------------------|
| AVISE  | 56.5 (34.5-76.8) | 92.6 (85.3-97.0) | 65.0 (45.5-80.5) | 89.7 (84.5-93.3) |
| ANA    | 87.0 (66.4-97.2) | 39.4 (29.4-50.0) | 26.0 (21.9-30.6) | 92.5 (80.7-97.3) |
| dsDNA  | 17.4 (5.0-38.8)  | 95.7 (89.5-98.8) | 50 (21.3-78.3)   | 82.6 (79.6-85.2) |
| Low C3 | 9.5 (1.2-30.4)   | 97.1 (85.0-99.9) | 66.7 (16.2-95.4) | 64.2 (60.6-67.5) |
| Low C4 | 14.3 (3.05-36.3) | 97.1 (85.1-99.9) | 75.0 (25.0-96.4) | 65.4 (61.1-69.4) |
| BC4d   | 13.0 (2.8-33.6)  | 95.7 (89.5-98.8) | 42.9 (15.3-71.7) | 81.8 (79.3-84.1) |
| EC4d   | 26.1 (10.2-48.4) | 90.4 (82.6-95.5) | 40.0 (20.9-62.3) | 83.3 (79.5-86.5) |

**Supplemental Table 2.** Using logistic regression, association between AVISE positivity and serologic markers with diagnosis of SLE at t = 2.

| Marker | Odds ratio (95% CI) | p-value |
|--------|---------------------|---------|
| AVISE  | 10.7 (2.56-44.86)   | 0.001   |
| ANA    | 2.0 (0.3-13.2)      | 0.48    |
| dsDNA  | 1.49 (0.21-10.7)    | 0.69    |
| Low C3 | 3.93 (0.17-89.6)    | 0.39    |
| Low C4 | 3.27 (0.20-52.6)    | 0.40    |
